1 Risk analysis of chewing betel quid among diabetic patients from the northeastern  
2 part of Bangladesh

3 Zafrul Hasan<sup>1</sup>, Md. Rafiul Islam<sup>1</sup>, Md. Soyib Hasan<sup>1</sup>, Miah Mohammad Sakib<sup>1</sup>, Md. Sifatul Islam<sup>1</sup>,  
4 Md. Belal Chowdhury, Saifuddin Sarker, Md. Rakibul Islam<sup>3</sup>, Mohammad Abul Hasnat<sup>1</sup>, Lalith  
5 Mohon Nath<sup>2</sup> and Md. Waseque Mia<sup>1</sup>

6  
7 <sup>1</sup> Dept. of Biochemistry and Molecular Biology, Shahjalal University of Science and Technology, Sylhet-3114,  
8 Bangladesh.

9 <sup>2</sup> Sylhet Diabetic Hospital, Sylhet, Bangladesh.

10 <sup>3</sup> Dept. of Biochemistry and Molecular Biology, University of Dhaka, Dhaka-1000.

11

12

13 Running title: Effect of betel quid on diabetes mellitus

14

15

16

17

18 \* Corresponding author

19

20 Email: [zafrul-bmb@sust.edu](mailto:zafrul-bmb@sust.edu) (Zafrul Hasan, PhD)

21

22

## 23 **Abstract**

24 **Background:** Betel quid (BQ) chewing is a common habit and a means of social interaction among  
25 the northeastern peoples of Bangladesh. Though this habit integrating in their daily life without  
26 knowing its toxic effect. Areca nut, which is one of the main components of BQ and may  
27 responsible for this addiction. Here, we assess to see how BQ chewing habit influence  
28 hyperglycemia among diabetic patients with respect to their lifestyle.

29 **Methodology:** Random blood sugar (RBS) test was evaluated from a total of 961 diabetic patients.  
30 Behavioral data associated with their daily lifestyle were collected from August 2018 to February  
31 2019 from Sylhet Diabetic Hospital, Bangladesh. Student's t-test, ANOVA and Fisher's exact test  
32 were used to assess the RBS status between BQ chewer and non-chewer patients.

33 **Results:** Higher RBS was found in BQ chewer patients than non-chewer (mean  $\pm$  SEM,  $263.3 \pm$   
34  $4.768$  vs.  $251.0 \pm 5.915$ mg/dl). Interestingly, it is significantly higher in raw areca nut user than  
35 dry nut (mean  $\pm$  SEM,  $278.0 \pm 8.790$  vs.  $252.1 \pm 6.835$  mg/dl) only from BQ chewer group,  
36 suggesting that the habit of chewing raw nut may contribute to more hyperglycemic effect among  
37 diabetic patients. BQ habit enhances higher RBS level among smoker, non-smoker and patient's  
38 having walking habit. In addition, BQ habit significantly influence to have high RBS in patients  
39 with family history with diabetes. Lack of awareness being diabetes have also been observed  
40 significantly in BQ chewer patients, while a higher level of RBS was seen in BQ group, who work  
41 in different sectors with sitting activities.

42 **Conclusions:** Diabetic patients who chew betel quid are more prone to keep higher hyperglycemic.  
43 Utmost attention should be taken to discourage the use of BQ for proper management of diabetes  
44 control.

45 **Keywords:** Betel quid, Areca nut, Hyperglycemia, Diabetes mellitus, and RBS.

## 46 **Introduction**

47 Chewing areca nut (major component) with others ingredients (e.g. betel leaf, slaked lime, and  
48 may contain tobacco) generally known as betel quid (BQ), is considered the fourth most common  
49 source of addiction, after caffeine, nicotine and alcohol [1,2]. The addiction of BQ among chewers  
50 is due to the presence of areca nut [3]. Indeed, BQ chewing is increasing alarmingly worldwide as  
51 a mean of social interaction, predominantly in Asian countries but also seen in North America,  
52 Africa, Australia, and Europe, because of immigrants [1,4]. The contributing factors of its  
53 widespread use are due to alertness, less fatigability and ecstatic feeling among the users because  
54 areca nut (locally known as supari or betel nut) contains various psychoactive alkaloids, mainly  
55 arecoline which bind to GABA receptors of brain and trigger the effects [3,5]. It is becoming  
56 evident that this particular bioactive ingredient interferes with insulin mediated glucose uptake by  
57 cells and associated with type II diabetes along with other diseases in betel nut users (including  
58 coronary artery and metabolic disease) [2,6]. In addition, the most common accompaniment for  
59 chewing areca nut is the leaf of *piper betel* (locally known as paan or betel leaf) in BQ, which is  
60 known for its antidiabetic potential that has been, demonstrated *in vivo* experiments [7,8].  
61 Therefore, it is of interest how areca nut in the presence of betel leaf in BQ influences  
62 hyperglycemic state among diabetic patients in population level is still enigmatic.

63  
64 Chewing BQ is one of the popular traditional habits in Bangladesh among men and women equally  
65 [4]. However, this habit is more prevalent in Sylhet division (the northeastern part of Bangladesh),  
66 may be due to the long history of cultural influence of nearby Indian boarder area. This population  
67 has also another tendency of chewing different form of nut, raw and/or dry in their BQ preparation.  
68 Interestingly, frequency of diabetic patients in Sylhet, aged 35 years or more are high, like other

69 division (south, southeastern and central part, where peoples are wealthier and educated with  
70 hypertension) of Bangladesh [9]. Therefore, in this population-based study, we aim to assess any  
71 association of chewing BQ and life style (e.g. smoking, physical activities, age, awareness and  
72 others) on hyperglycemic status among diabetic patients, which have never been explored in this  
73 region of Bangladesh.

## 74 **Methods**

### 75 **Study population**

76 All the participants for this population-based study were from northeastern part of Bangladesh,  
77 Sylhet. People of Sylhet region, of various age groups are traditionally habituated with betel leaf  
78 and areca nut chewing than other region of Bangladesh and diabetes prevalence also high among  
79 this local people [9]. General people who are less educated with relaxed lifestyle and source of  
80 income mostly of foreign remittance as one of the members from each household live in abroad.  
81 This place is geographically and environmentally very suitable region (subtropical climate and  
82 rich terrain) of growing *areca catechu* tree for areca nut and *piper betel* plant for betel leaf.

### 83 **Study design and random blood sugar test**

84 A total of n=961 patient's blood samples and their behavioral data from August 2018 to February  
85 2019, (RBS mg/dl, median 237; IQR, 170-321.5) were collected, whom visited Sylhet Diabetic  
86 Hospital from morning to noon for random blood sugar test. RBS testing is a powerful tool for  
87 people with diabetes to assess how well the disease is being managed and this test can be used to  
88 measure the blood glucose level regardless to the time of meal. We did not account any reference  
89 value above or below the threshold level of RBS rather all range of sugar level were collected as  
90 the patients have already diagnosed with diabetes and visiting hospital for routine check.

91 Duplication was excluded using unique id provided by hospital as well patients name. Patients  
92 who chew betel leaf with areca nut as dry and/or raw form considered as betel quid positive chewer,  
93 otherwise betel quid negative chewer. Data was excluded from the analysis of patients having  
94 only betel leaf or areca nut chewing habit along. Blood was drawn from each participant and  
95 allowed for clotting at room temperature followed by centrifuged at 3000 rpm for 10 minutes.  
96 Separated serum was used for RBS test according to manufacturer's instructions (Human  
97 Diagnostic, Germany) with a semi-automated biochemistry analyzer (Humalyzer 3000, USA).

## 98 **Questionnaire data**

99 All the participants of diabetic patients were given a consent form for their approval and after  
100 getting their informed consent, a standard questionnaire set was circulated among the study  
101 participants to answer. Information on sociodemographic data were collected by trained medical  
102 stuff, which contained responder's name, id, age, sex, physical activity, body weight, smoking,  
103 alcohol intake, type of diabetes, family history, occupation, age of first time diagnosis, betel leaf,  
104 betel nut (raw or dry form) and cellular number using one-to-one interview. This population-based  
105 study was received ethical approval by the ethic committee of school of life sciences, Shahjalal  
106 University of Science and Technology (SUST), Bangladesh.

## 107 **Statistical analysis**

108 All Statistical analyses were performed using Prism 6 software (GraphPad). A  $p$  value  $<0.05$   
109 indicated by asterisk (significant), otherwise  $p$  value  $> 0.05$  indicated by ns (not significant).  
110 Unpaired t-test or student's t-test (two-tailed) was done to assess the differences between  
111 independent variables. To determine any differences among the groups One-way ANOVA was  
112 performed. To examine the significance of association between the two kinds of variables, Fisher's

113 exact was performed. All through values were represented as mean  $\pm$  standard error of the mean  
114 (SEM), otherwise noted.

## 115 **Results**

### 116 **Chewing BQ and random blood glucose among diabetes patients**

117 To see the effect of chewing BQ on random blood glucose (RBS, mg/dl) level among diabetic  
118 patients, we enrolled, n=961 individuals with their consent. RBS generally assess how well the  
119 disease is being managed and the test can be used to measure glucose level at any time to identify  
120 hyperglycemia. Though BQ chewer group was shown higher RBS level, Fig 1 (mean  $\pm$  SEM,  
121 263.3  $\pm$  4.768) than non-chewer (mean  $\pm$  SEM, 251.0  $\pm$  5.915) but not reached statistical  
122 significance. Previous study have shown areca nut which is one of the main components of BQ is  
123 responsible for hyperglycemia [2]. Interestingly the local people of Sylhet region are very familiar  
124 with adding raw nut in their BQ preparation with other ingredients as it has mild head spinning  
125 and mouth aroma effect rather than dry nut. Almost half of the studied population use raw nut in  
126 their quid and the proportion of raw vs. dry nut chewer was 45.6% and 54.4% respectively. It is  
127 not practical to chew only betel leaf or nut alone, rather local folks prefer to use in combined form  
128 and thus the issue guide us to see the effect of chewing raw and dry nut on RBS level. Patients  
129 who chewed raw nut in BQ had significantly higher RBS (mean  $\pm$  SEM, 278.0  $\pm$  8.790 vs. 252.1  
130  $\pm$  6.835 mg/dl) than those with dry nut user (Fig 2). In addition, patients who chewed both raw  
131 and dry nut in BQ (mean  $\pm$  SEM, 261.6  $\pm$  9.726), no significant difference of RBS was found either  
132 with raw or dry nut chewer group of patients (Fig 2). Taken together, this result demonstrating that  
133 raw nut may play an important role in keep rising blood sugar more in diabetic patients and this  
134 subtle outcome cannot be seen in dry and both nut user. This is may be due to the presence of

135 psychoactive alkaloids in raw nut, which may be lost or compromised its spectrum during the  
136 drying or other processes before placing in BQ preparation.

### 137 **Effect of smoking on BQ chewer of diabetic patients**

138 Smoking habit is a well-known and independent risk factor in many diseases, including diabetes  
139 [10,11]. To see any association between BQ and smoking habit among the diabetic patients, we  
140 split the data between BQ chewer and non-chewer with their smoking habit. Surprisingly, no  
141 additive effect of smoking on BQ chewer was found, while significantly higher RBS was found in  
142 nonsmoker BQ chewer group (S1 Fig). From our initial analysis of Fig 1 and 2, RBS was  
143 significantly higher in BQ chewer having raw nut, which prompted us to look the effect of smoking  
144 on BQ chewers, with practice of adding raw and/or dry nut in their quid preparation. Interestingly,  
145 BQ chewers with raw nut group have shown significantly higher RBS than non-BQ chewers (mean  
146  $\pm$  SEM,  $291.5 \pm 19.89$  vs  $232.4 \pm 15.48$ ) within the smoker patients (Fig 3a). It is also important  
147 to note that same trend of significant higher RBS was found in BQ chewers with raw nut group  
148 even in nonsmoker patients (Fig 3b). Thus, this result indicating that, presence of raw nut in BQ  
149 preparation may be responsible for keeping higher RBS level in diabetic patients, regardless their  
150 smoking habit.

### 151 **Physical activities on BQ chewer of diabetes patients**

152 It is reported that physical activities has lowering effect on blood glucose level [12,13], which  
153 guide us to see how BQ chewing habit influences on physical activity toward patients RBS. Even  
154 though it seems that BQ has no impact on patients with or without physical activity by fisher's  
155 exact test (Fig 4), interestingly RBS level was higher (mean, 297 mg/dl) in BQ group even with  
156 physical activity. This is an indication that BQ may have exacerbated effect toward rising RBS  
157 level, even people who has walking habit.

## 158 **Family history and BQ chewing habit of diabetes patients**

159 Family history is one of the major risk factors to developed diabetes at any stage of individual's  
160 life [14-16]. Current understanding of heritability or genetic predisposition information is not  
161 enough but also need to address the possible risk factors that are associated with our daily life,  
162 such as BQ habit. In this study, we have defined family history, at least one of the family members  
163 have diabetes, which may be either, father / mother / sibling or any two or all of them. Thus, our  
164 results indicating that patients with family history of diabetes have more probability of being  
165 higher RBS with BQ chewer habit than non-chewer (mean  $\pm$  SEM,  $258.3 \pm 7.432$  vs.  $238.3 \pm$   
166  $6.414$ ), which is significant (Fig 5). Interestingly, without any family history of diabetes, this BQ  
167 habit has also tiny effect on RBS level (Fig. 5), supporting that BQ has negative impact on diabetic  
168 patients.

## 169 **Lack of awareness of being diabetes among BQ chewers**

170 BQ users have been experienced reinforcing effects including, reduce tension, euphoria, sense of  
171 well-being, and increased capacity to work, due to the psychoactive properties of its major  
172 components, areca nut. [17,18]. Considering the previous literatures and our result from this  
173 studied diabetic population have shown that BQ habit may put the individual in euphoric and bit  
174 confident that they may not have problem with blood glucose, which, however, delayed diagnosis  
175 of having diabetes (Fig. 6). It could be possible the individuals suffering with hyperglycemia little  
176 early before the diagnosis which is statistically significant between chewer and non-chewer group  
177 ( $p < 0.0006$ ). It is conceivable that this lack of awareness may be due to presence of areca nut or  
178 supari, because people believe that it has medicinal potential with long history of use, as herbal  
179 drug [19].

180



## 181 **Influence of BQ chewing on various occupational people**

182 We observed people with various occupations have BQ chewing habit irrespective of their  
183 education and income status in Sylhet. Several studies indicate that diabetes are more prevalent in  
184 those peoples who has occupation with sedentary activity [20,21]. Here we explore the effect of  
185 BQ on diabetes patients having various occupational backgrounds (e.g. agriculture, business,  
186 driver, office worker, teacher, housewife and others). Like other reported study, we have also seen  
187 the significantly higher level of RBS (Table 2) in BQ chewer group who work in different offices  
188 with sitting job (mean  $\pm$  SEM,  $283.6 \pm 16.63$  vs.  $227.6 \pm 11.52$  mg/dl). Noteworthy, higher RBS  
189 was also seen in other occupations with BQ chewer group than non-chewer except the housewife,  
190 because this group might be always occupied themselves with many family issues throughout the  
191 day, which therefore, promoting physical activities.

## 192 **Discussion**

193 In this population-based study on northeastern part of Bangladesh, Sylhet, we attempt to assess  
194 how the BQ chewing practice influence hyperglycemic level on diabetic patients considering  
195 various confounder factors associated with daily life styles (e.g. physical activity, smoking, family  
196 history, age, occupation and awareness). One of our keen interests of focus was, using of areca  
197 nut in form of raw and dry in their BQ preparation. Local people of this region of various ages  
198 prefer to have BQ with raw and/or dry nut all through their working and leisure time. Our  
199 preliminary analysis indicates that the prevalence rate of chewing BQ tendency becoming higher  
200 in people with age and interestingly RBS level also being high in these older age group people  
201 with diabetes Table 1. We believe this may be due to the presence of areca nut in BQ, because it  
202 contains psychoactive addictive substances (e.g. arecoline and other alkaloids) [2,5] and also  
203 cannot rule out the other factors, such as family milieu and cultural influences towards getting this

204 BQ habit as a mean of socialization with others. This is alarming because the main workforce  
205 people (30-50 years) are affected by this BQ habit without knowing its long term toxic effect on  
206 them, since the toxicity of BQ chewing is usually mild and unobserved [18].

207 Although chewing habit of areca nut in the form of betel quid (BQ) is very old and cultural practice,  
208 which is intensely integrated in people's daily life, not only in Asia but also in different immigrants  
209 dominated parts of the world [1,4,22]. Previous study has reported that chewing areca nut is  
210 associated with diabetes [2] and we have seen in our study that diabetic patients who chew raw nut  
211 in BQ preparation has significantly higher RBS than that of dry nut chewer (Fig 2). Interestingly  
212 this difference could not be seen between BQ chewer vs non-chewer (Fig 1) irrespective of used  
213 form of nut, indicating that it is imperative to evaluate the ingredients and it's form in BQ  
214 preparation separately. Indeed, we also did not find any significant difference of RBS in smoker  
215 patients with or without BQ chewing habit, but could see significant difference in nonsmoker  
216 patients S1 Fig. Again after considering the used form of nut in BQ in smoker and nonsmoker,  
217 significant difference was appeared between chewer with raw nut vs. non-chewer diabetes patients  
218 but not with dry nut chewer (Figs 3a and 3b), implying that raw form of nut user are in more prone  
219 to elevated RBS, without knowing its silent hyperglycemic effect.

220  
221 A healthy lifestyle such as physical activity or walking can keep one's blood glucose level in target  
222 range, while lack of such activity or sedentary lifestyles are highly associated with diabetes [23].  
223 Analysis of our dataset, observed that BQ chewing has adverse impact on keeping higher blood  
224 glucose level even the patients with walking activity (Fig 4). It should be noted that we could not  
225 get the exact information of patients walking nature, i.e. how long, frequency, what time of the  
226 day, indoor (treadmills), outdoor and others. Some people have very healthy lifestyle, while being

227 diagnosed with diabetes, because of predisposition with family history of diabetes or genetic  
228 association. Our analysis also revealed that patients with family history has significantly higher  
229 RBS with BQ chewing habit (Fig 5), and collectively these results are suggesting that the BQ habit  
230 may contribute to keep the diabetes patient in hyperglycemic state subtly and which, however,  
231 been overlooked by medical community, because of lack of proper literature.

232  
233 We have seen people of various ages of Sylhet region have BQ chewing habit Table 1 and believe  
234 that it is good for health, particularly for digestion. Arecoline, a major psychoactive alkaloid of  
235 areca nut in BQ preparation, trigger mild euphoric effect and sense of well-being [3,5].  
236 Remarkably our data indicate that BQ chewer are significantly less aware of being hyperglycemic  
237 and perform diabetes test later than of non-chewer people (Fig 6). In addition, people with different  
238 occupations have also been seen with this BQ chewing habit i.e. agriculture, businessman, driver,  
239 office worker, housewife, and, teacher, may be due to the euphoric effect by areca nut. Indeed, our  
240 result with good agreement with other study expressed that significantly higher RBS was identified  
241 people with sedentary occupation, like office work, who used to sit in their chair with mouth of  
242 BQ Table 2.

243 This study is not without any limitations and one of the major confounder factors that we could  
244 not integrate whether the patients were under medication at the time of enrollment. Sometimes  
245 patients actually reluctant to answers lot of questions, specifically the nature of medication use,  
246 other than their doctor. Another few factors, like household income, level of education, food habit  
247 (junk or healthy), tobacco use, sample size, are the few possible confounders need to be addressed  
248 in future extended study including other areas of Bangladesh. One of the key strength of this study,  
249 that we included several factors associated with socioeconomic and lifestyles, which were lacking

250 in some of the previous studies by other groups [2,23]. Moreover, this study population was quite  
251 homogeneous population as they were almost locally born in Sylhet, not like other big divisions  
252 where peoples coming from different part of Bangladesh for work purposes.

253

## 254 **Conclusions**

255 Taken together, this population-based study suggesting that diabetes patients with chewing BQ  
256 habit are associated with elevated level of blood glucose. Indeed, attending medical doctor in the  
257 diabetes hospital has not aware that BQ could be one of the reasons of hyperglycemia because of  
258 lack of proper literature and knowledge. Therefore, BQ habit may have literally negative impact  
259 on diabetes management and treatment. Utmost attention should be given towards BQ as this habit  
260 becoming an addiction and integrating silently in our social life and discourage as strongly as other  
261 addiction like tobacco. Thus, medical community should convey this information in the society  
262 for proper management of BQ mediated hyperglycemia and should highlight the need for more  
263 research of this addictive disorder.

264

## 265 **Acknowledgments**

266 We thank Dr. A Z Mahbub Ahmed, Superintendent, Sylhet Diabetic Hospitals, Sylhet, Bangladesh  
267 for his approval and support of this study. We wish to thank the technicians, students of BMB,  
268 SUST for their generous help in sampling and data collection. Authors are thankful to all  
269 participants for blood sample and their participation in this study.

270

271

## 272 **Author Contributions**

273 Conceived and designed the study: ZH, MRI, MSH, MMS, and MSI. Sampling and data collection:  
274 MRI, MSH, MMS, and MSI. Analyzed the data: ZH. Suggestion and technical help: MWM and  
275 MAH. Wrote the paper: ZH. Reviewed/edited the manuscript: ZH and MRI.

## 276 **References**

- 277  
278 1. Gupta PC, Warnakulasuriya S (2002) Global epidemiology of areca nut usage. *Addict Biol* 7:  
279 77-83.
- 280 2. Tseng CH (2010) Betel nut chewing and incidence of newly diagnosed type 2 diabetes mellitus  
281 in Taiwan. *BMC Res Notes* 3: 228.
- 282 3. Boucher BJ, Mannan N (2002) Metabolic effects of the consumption of Areca catechu. *Addict*  
283 *Biol* 7: 103-110.
- 284 4. Wu F, Parvez F, Islam T, Ahmed A, Rakibuz-Zaman M, et al. (2015) Betel quid use and  
285 mortality in Bangladesh: a cohort study. *Bull World Health Organ* 93: 684-692.
- 286 5. Chu NS (2002) Neurological aspects of areca and betel chewing. *Addict Biol* 7: 111-114.
- 287 6. Khan MS, Bawany FI, Ahmed MU, Hussain M, Khan A, et al. (2013) Betel nut usage is a major  
288 risk factor for coronary artery disease. *Glob J Health Sci* 6: 189-195.
- 289 7. Santhakumari P, Prakasam A, Pugalendi KV (2006) Antihyperglycemic activity of Piper betle  
290 leaf on streptozotocin-induced diabetic rats. *J Med Food* 9: 108-112.
- 291 8. Arambewela LS, Arawwawala LD, Ratnasooriya WD (2005) Antidiabetic activities of aqueous  
292 and ethanolic extracts of Piper betle leaves in rats. *J Ethnopharmacol* 102: 239-245.
- 293 9. Akter S, Rahman MM, Abe SK, Sultana P (2014) Prevalence of diabetes and prediabetes and  
294 their risk factors among Bangladeshi adults: a nationwide survey. *Bull World Health Organ* 92:  
295 204-213, 213A.

- 296 10. Uchimoto S, Tsumura K, Hayashi T, Suematsu C, Endo G, et al. (1999) Impact of cigarette  
297 smoking on the incidence of Type 2 diabetes mellitus in middle-aged Japanese men: the Osaka  
298 Health Survey. *Diabet Med* 16: 951-955.
- 299 11. Chang SA (2012) Smoking and type 2 diabetes mellitus. *Diabetes Metab J* 36: 399-403.
- 300 12. Pan XR, Yang WY, Li GW, Liu J (1997) Prevalence of diabetes and its risk factors in China,  
301 1994. National Diabetes Prevention and Control Cooperative Group. *Diabetes Care* 20: 1664-  
302 1669.
- 303 13. Mokdad AH, Ford ES, Bowman BA, Dietz WH, Vinicor F, et al. (2003) Prevalence of obesity,  
304 diabetes, and obesity-related health risk factors, 2001. *JAMA* 289: 76-79.
- 305 14. Hu Z, Gao F, Qin L, Yang Y, Xu H (2019) A Case-Control Study on Risk Factors and Their  
306 Interactions with Prediabetes among the Elderly in Rural Communities of Yiyang City, Hunan  
307 Province. *J Diabetes Res* 2019: 1386048.
- 308 15. Petro AE, Cotter J, Cooper DA, Peters JC, Surwit SJ, et al. (2004) Fat, carbohydrate, and  
309 calories in the development of diabetes and obesity in the C57BL/6J mouse. *Metabolism* 53: 454-  
310 457.
- 311 16. Vornanen M, Konttinen H, Kaariainen H, Mannisto S, Salomaa V, et al. (2016) Family history  
312 and perceived risk of diabetes, cardiovascular disease, cancer, and depression. *Prev Med* 90: 177-  
313 183.
- 314 17. Chu NS (2001) Effects of Betel chewing on the central and autonomic nervous systems. *J*  
315 *Biomed Sci* 8: 229-236.
- 316 18. Deng JF, Ger J, Tsai WJ, Kao WF, Yang CC (2001) Acute toxicities of betel nut: rare but  
317 probably overlooked events. *J Toxicol Clin Toxicol* 39: 355-360.

318 19. Medicine SAoTC (1999) Chinese Material Medica. Science and Technology Press of  
319 Shanghai, China 8: 439-648.

320 20. Gao Y, Xie X, Wang SX, Li H, Tang HZ, et al. (2017) Effects of sedentary occupations on  
321 type 2 diabetes and hypertension in different ethnic groups in North West China. Diab Vasc Dis  
322 Res 14: 372-375.

323 21. Lim MS, Park B, Kong IG, Sim S, Kim SY, et al. (2017) Leisure sedentary time is differentially  
324 associated with hypertension, diabetes mellitus, and hyperlipidemia depending on occupation.  
325 BMC Public Health 17: 278.

326 22. Burton-Bradley BG (1979) Arecaidinism: betel chewing in transcultural perspective. Can J  
327 Psychiatry 24: 481-488.

328 23. Rahman MS, Akter S, Abe SK, Islam MR, Mondal MN, et al. (2015) Awareness, treatment,  
329 and control of diabetes in Bangladesh: a nationwide population-based study. PLoS One 10:  
330 e0118365.

### 331 **Figure legends**

332 **Fig 1. BQ chewing effect on diabetes patients.** Patients with BQ chewer habit shown higher RBS  
333 level (mean  $\pm$  SEM,  $263.3 \pm 4.768$ ) than non-chewer (mean  $\pm$  SEM,  $251.0 \pm 5.915$ ), though it did  
334 not reach statistical significant. ns, not significant using student-t test where  $p$  value  $> 0.05$  is  
335 significant.

336

337 **Fig 2. Effect of raw and dry form of areca nut in BQ preparation among diabetes patients.**  
338 Higher RBS (mean  $\pm$  S.E.M,  $278.0 \pm 8.790$  mg/dl) was found in raw nut chewer than that of dry  
339 nut chewer patients (mean  $\pm$  S.E.M,  $252.1 \pm 6.835$  mg/dl), which is statistically significant ( $p <$   
340  $0.0186$ ), using student-t test.

341

342 **Fig 3. Effect of BQ chewing on diabetes patients having smoking habit.** (a) Patients with  
343 smoking habit, significantly higher RBS was found in raw nut BQ chewer (mean  $\pm$  SEM, 305.0  $\pm$   
344 17.19) with respect to no BQ chewer group (mean  $\pm$  SEM, 245.8  $\pm$  9.718). (b) Patients with  
345 nonsmoking habit, significantly higher RBS was found in raw nut BQ chewer (mean  $\pm$  SEM, 291.5  
346  $\pm$  19.89) with respect to no BQ chewer group (mean  $\pm$  SEM, 232.4  $\pm$  15.48). *p* value <0.05  
347 indicated by asterisk (significant), otherwise *p* values are > 0.05 indicated by ns (not significant),  
348 using student-t test.

349

350 **Fig 4. Impact of BQ chewing on diabetes patients having walking habit.** BQ chewer diabetes  
351 patients with walking habit has no impact on lowering RBS level, with respect to not walking BQ  
352 chewer patients, which is statistically not significant by Fisher's exact test.

353

354 **Fig 5. Influence of BQ chewing habit on diabetes patients with family history.**  
355 Higher RBS was found in diabetes patients having BQ habit who has family history of diabetes,  
356 which is significant using student-t test (*p* < 0.05).

357

358 **Fig 6. Awareness of being hyperglycemic between BQ chewer vs. non-chewer.** BQ chewer  
359 peoples have tendency of diagnosis with diabetes at the late age with respect to non-chewer, which  
360 is statistically significant using student-t test (*p* < 0.0006).

361

362

363



364 **Figure 1**

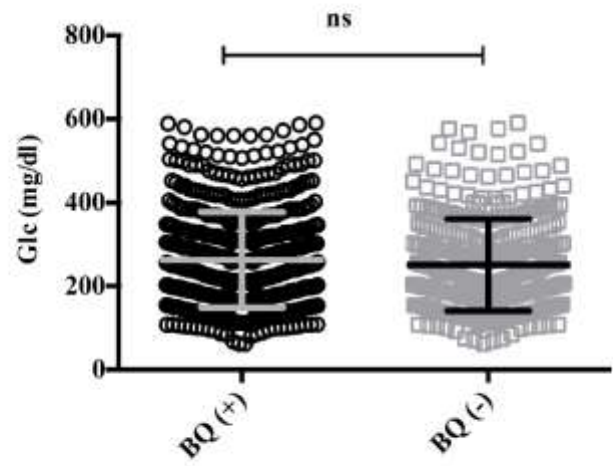

365

366 **Figure 2**

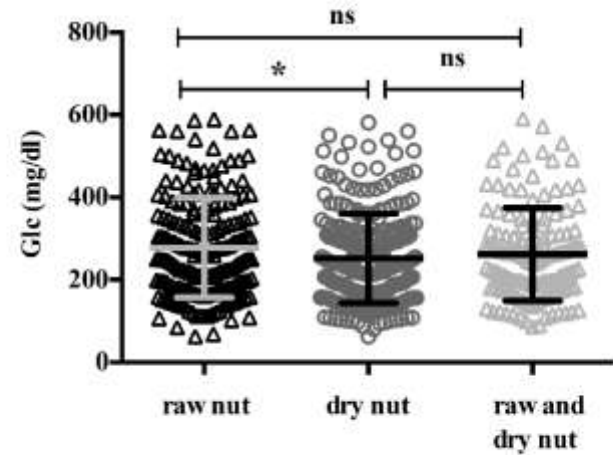

367

368

369 **Figure 3A**

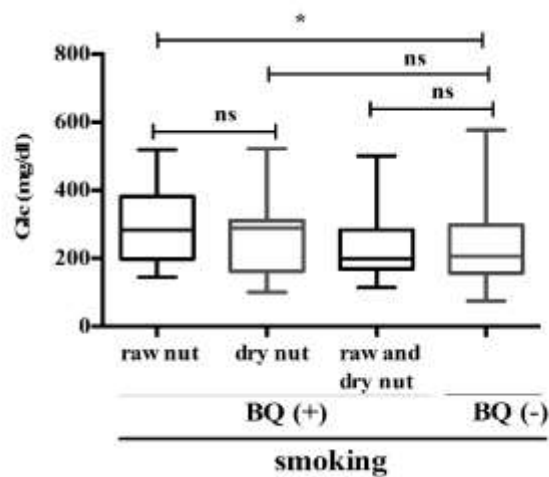

370

371 **Figure 3B**

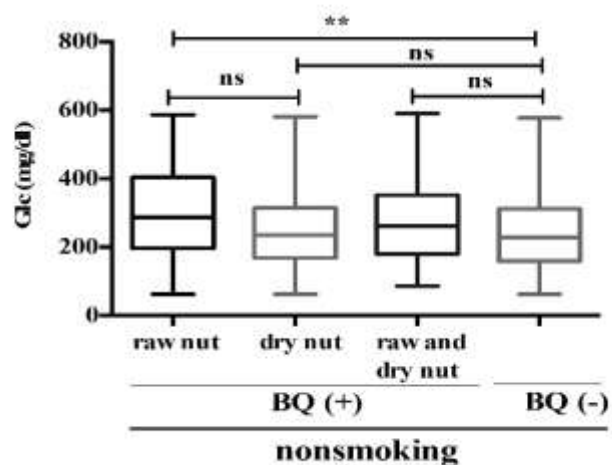

372

373

374 **Figure 4**

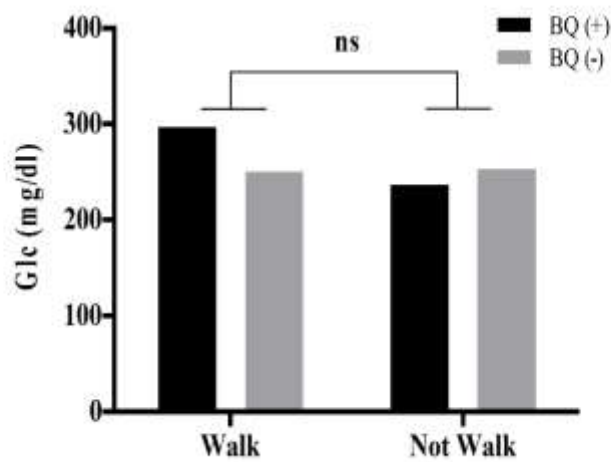

375

376 **Figure 5**

377

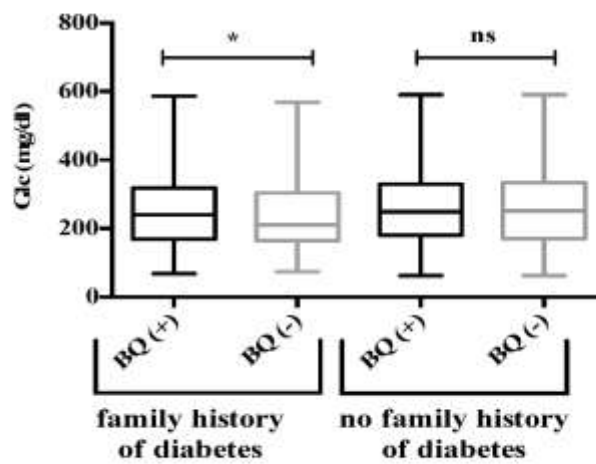

378

379 **Figure 6**

380

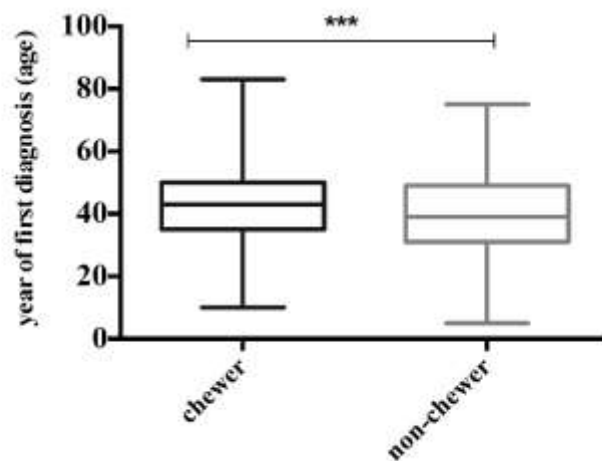

381

382

383

384

385

386

387

388

389

390

391

392

393 **Tables**

394 **Table 1. Glucose level as RBS among various aged group diabetes patients with and**  
 395 **without BQ habit.**

396

| 397<br>398<br>Age group<br>(years) | 397<br>Prevalence rate (%) |                   | 397<br>Glucose (mg/dl)<br>mean ± SEM |                   | 397<br><i>p</i> (<0.05) |
|------------------------------------|----------------------------|-------------------|--------------------------------------|-------------------|-------------------------|
|                                    | 398<br>chewer              | 398<br>non-chewer | 398<br>chewer                        | 398<br>non-chewer |                         |
| 399<br><30                         | 28.8                       | 71.2              | 229.0 ± 34.46                        | 258.8 ± 21.03     | <i>ns</i>               |
| 400<br>30-39                       | 52.2                       | 47.8              | 271.0 ± 13.10                        | 248.6 ± 14.24     | <i>ns</i>               |
| 401<br>40-49                       | 64.5                       | 35.5              | 253.1 ± 8.68                         | 234.9 ± 11.45     | <i>ns</i>               |
| 402<br>50-59                       | 69.4                       | 30.6              | 261.4 ± 7.844                        | 252.7 ± 11.75     | <i>ns</i>               |
| 403<br>60-69                       | 62.5                       | 37.5              | 278.7 ± 13.60                        | 267.4 ± 15.21     | <i>ns</i>               |
| 404<br>>70                         | 68.6                       | 31.4              | 273.0 ± 17.32                        | 247.3 ± 18.30     | <i>ns</i>               |

402

403 BQ = betel quid, *ns* = not significant

404 **Table 2. RBS level among various occupants with diabetes having BQ chewing habit or not.**

405

| 406<br>Occupation    | 406<br>Glucose (mg/dl)<br>mean ± SEM |                   | 406<br><i>p</i> (<0.05) |
|----------------------|--------------------------------------|-------------------|-------------------------|
|                      | 407<br>chewer                        | 407<br>non-chewer |                         |
| 408<br>Agriculture   | 274.1 ± 19.69                        | 252.4 ± 31.52     | <i>ns</i>               |
| 409<br>Business      | 266.3 ± 14.23                        | 250.7 ± 15.62     | <i>ns</i>               |
| 410<br>Driver        | 287.1 ± 39.07                        | 244.4 ± 47.02     | <i>ns</i>               |
| 411<br>Housewife     | 256.3 ± 5.900                        | 260.7 ± 8.772     | <i>ns</i>               |
| 412<br>Office worker | 284.2 ± 13.91                        | 227.6 ± 11.52     | **                      |
| 413<br>Teacher       | 260.0 ± 20.13                        | 244.2 ± 19.64     | <i>ns</i>               |
| 414<br>Others        | 272.2 ± 53.14                        | 252.1 ± 37.01     | <i>ns</i>               |

411 Data are expressed as chewer vs. non-chewer with significant *p* values (<0.05) indicated by

412 asterisks, otherwise *p* values are > 0.05 by student-t test. BQ = betel quid, Others = unemployed,

413 students, and no information, *ns* = not significant.
